# Supplementary material for: Research of mechanical model based on characteristics of facture mechanics of ice cutting for scientific drilling in polar region
Source: Copernicus journal article supplement (doi:10.5194/egusphere-2023-2985), 2024-01-03
Supplement: Supplementary file [file egusphere-2023-2985-AC2-supplement.pdf]

Dear Referee,

Thank you for your response, and pass our great thanks to you for fruitful comments and advises. We tried to consider all mentioned comments and hereafter explain every change made point by point. The comments are in black, and our answers are in red. After addressing the comments raised, we believe that the manuscript would be sufficiently improved and reach the standards of TC.

## **Comments from referees:**

### **-Referee #1:**

The most interesting finding to me was seen in Figure 9 and discussed in lines 246 to 254; the low frequency oscillations from the formation and clearing of ice chips. I would like to see this concept expended – inherently all ice drills deflect under load so is it possible the oscillating cutting force creates a harmonic in the drill? Does this effect core quality? Can the oscillation be mitigated? Or could the drill be tuned to minimize cutting power by harnessing the momentum created with the ice fractures?

This has been modified. The 5.1 Analysis of the characteristics of cutting force section has conducted in-depth analysis and research on this oscillation. “Unlike ductile materials, where the chips produced by a shearing action are continuous and the forces encountered relatively constant, chips from brittle materials are produced by a repeated series of breaks, when the cutter presses into the ice, the force begin to rise and elastic energy is stored in the cutter assembly. Some of the energy is expended in local crushing as the force continues to rise. As the cutting force reaches a magnitude necessary to induce a major fracture. The ice layer undergoes shear-slip deformation. As the cutting force reached a magnitude necessary to induce a major fracture. A crack propagates into the ice, releasing the cutter elastic energy and dislodging a major ice chip, the force than suddenly decreases, before the cycle repeats. Therefore, during the cutting and drilling process in the ice layer, the cutting force exhibits an oscillating state, the frequency of the cutting force fluctuation should vary with the rotation speed of the drill bit.

And the amplitude of the oscillation is related to the cutting depth, as the cutting depth increases, the amplitude increases. At the same time, as the cutting depth increases, the degree of crack propagation into the ice will also increase. When the crack extends into the ice core, it will cause a decrease in the surface quality of the ice core. Therefore, it is necessary to control the cutting depth reasonably during the drilling process to ensure the quality of the ice core. Moreover, the study results on mechanical models of ice cutting process indicated that: “within the range of  $\beta - \gamma_0 \leq \frac{\pi}{2}$ , the cutting force gradually decreases with the increases of the rake angle”. Therefore, the rake angle can be appropriately increases within this range to reduce the oscillation.”.

I would like to see the effect of ice properties explored against the cutting force. We know that the ice properties change significantly with grain size and temperature (Petrovic, J.J., 2003) but this was not included in the study, although a robust drill design must work in a variety of conditions.

In the process of polar drilling, a robust drill design must work in a variety of conditions, and the drilling process under variety working conditions may require different cutting forces. And, we are committed to exploring the changes in cutting force under various experimental conditions. Therefore, an explanation of the reasons for selecting only one type of ice has been added to the article: “This study mainly focuses on the establishment of mechanical model during the ice cutting and drilling process. And, studies have shown that the crystal orientation, the crystal size and the density of ice samples in NGRIP boreholes in Greenland are similar to naturally formed and artificially frozen ice samples (Center for Ice and Climate, 2023; Cuffey and Paterson, 2010). Moreover, many scholars have conducted experiments on artificially prepared or naturally formed ice samples, and have ultimately obtained convincing experimental data and conclusions,

providing valuable references for research in the polar field (Narita et al., 1994; Talalay, 2003; Hong et al., 2015; Wang et al., 2024). In order to better observe the formation process of ice chip, at present stage, this study selected transparent ice and explored the fracture process and cutting force generated by this type of ice. And the ice with variety properties belongs to brittle materials, and there will be similarities in the fracture process. In the future, the cutting and drilling experiments under different ice sample properties to explore the effect of ice properties against the cutting force will be carried out.”

The range of rake angle was from  $20^\circ$  to  $40^\circ$ , which doesn't even include the range of existing drills. Plots, such as Figure 10, indicated that the cutting force will continue to decrease with increasing rake angle. I would have liked to see that explored, at least until a physical limit was approached (e.g. the rake angle intersected with the relief angle). Then future designers could pursue better blade design and weight it against durability.

In the process of studying the influence of the bit geometry on cutting force, the angle of the cutter should include or even exceed the angle range already exists in the stage as much as possible. In this paper, we are committed to exploring the establishment of mechanical models during the ice cutting and drilling process, and verifying the correctness of the mechanical models within a certain range. In future research, we will expand the range of angle selection and even consider negative rake angles.

Same with depth of cut – it would be useful continue the trend to a maximum or asymptote.

It is very meaningful and necessary continue the trend to a maximum or asymptote, we are now in the gradual exploration stage, and in the future, we will conduct in-depth research on this, studying phenomena under various extreme conditions.

On behalf of co-authors,

Rusheng Wang
